# Supplementary material
Source: PubMed Central journal article supplement (PMC8092530)
Supplement: AAC.01771-20-s0001.pdf [file AAC.01771-20-s0001.pdf]

Table S1 Bacterial strains and plasmids used in this study

| Strain(s) or plasmid            | Relevant characteristics                                                                                                                                                                                                                                                  | Source or reference*       |
|---------------------------------|---------------------------------------------------------------------------------------------------------------------------------------------------------------------------------------------------------------------------------------------------------------------------|----------------------------|
| <i>E. coli</i> strains          |                                                                                                                                                                                                                                                                           |                            |
| DH5a                            | F <sup>-</sup> , ø80dlacZDM15, D( <i>lacZYA-argF</i> )U169, <i>deoR</i> , <i>recA1</i> , <i>endA1</i> , <i>hsdR17</i> ( <i>rK<sup>-</sup></i> , <i>mK<sup>+</sup></i> ), <i>phoA</i> , <i>supE44</i> , <i>l<sup>-</sup></i> , <i>thi-1</i> , <i>gyrA96</i> , <i>relA1</i> | Laboratory collection      |
| BL21                            | F <sup>-</sup> , <i>ompT</i> , <i>hsdS</i> ( <i>rBB<sup>-</sup>mB<sup>-</sup></i> ), <i>gal</i> , <i>dcm</i> (DE3)                                                                                                                                                        | CWBIO                      |
| BL21/pET28a                     | Kan <sup>r</sup> ; BL21 containing the pET28a vector                                                                                                                                                                                                                      | This study                 |
| BL21/pET28a- <i>osaR</i>        | Kan <sup>r</sup> ; BL21 containing the pET28a- <i>osaR</i> vector                                                                                                                                                                                                         | This study                 |
| BL21/pETMAL- <i>osaR</i>        | Kan <sup>r</sup> ; BL21 containing the pETMAL- <i>osaR</i> vector                                                                                                                                                                                                         | This study                 |
| Transetta                       | F <sup>-</sup> <i>ompT hsdSB</i> ( <i>rB<sup>-</sup> mB<sup>-</sup></i> ) <i>gal dcm lacYI ahpC</i> (DE3) <i>gor522::Tn10 trxB</i> pRARE                                                                                                                                  | TransGen                   |
| Transetta/pET28a- <i>PA0055</i> | Kan <sup>r</sup> ; Transetta containing the pETMAL- <i>PA0055</i> vector                                                                                                                                                                                                  | This study                 |
| <i>P. aeruginosa</i> strains    |                                                                                                                                                                                                                                                                           |                            |
| PAK(WT)                         | wild-type strain                                                                                                                                                                                                                                                          | David Bradley <sup>a</sup> |
| Δ <i>osaR</i>                   | PAK Δ <i>osaR</i> ( <i>PA0056</i> )                                                                                                                                                                                                                                       | (1)                        |
| Δ <i>osaR</i> / <i>osaR</i>     | Δ <i>osaR</i> / pDN18- <i>osaR</i> , Tc <sup>r</sup> ; Δ <i>osaR</i> containing the pDN18- <i>osaR</i> vector                                                                                                                                                             | This study                 |
| PAK/pDN18                       | PAK/ pDN18, Tc <sup>r</sup> ; Δ <i>osaR</i> containing the pDN18 vector                                                                                                                                                                                                   | This study                 |
| Δ <i>osaR</i> /pDN18            | Δ <i>osaR</i> / pDN18, Tc <sup>r</sup> ; Δ <i>osaR</i> containing the pDN18 vector                                                                                                                                                                                        | This study                 |
| Δ <i>dsbM</i>                   | PAK Δ <i>dsbM</i> ( <i>PA0058</i> )                                                                                                                                                                                                                                       | (2)                        |
| Δ <i>dsbM</i> / <i>dsbM</i>     | Δ <i>dsbM</i> /pDN18- <i>dsbM</i> , Tc <sup>r</sup> ; Δ <i>dsbM</i> containing the pDN18- <i>dsbM</i> vector                                                                                                                                                              | This study                 |
| Δ <i>dsbM</i> / pDN18           | Δ <i>osaR</i> / pDN18, Tc <sup>r</sup> ; Δ <i>osaR</i> containing the pDN18 vector                                                                                                                                                                                        | This study                 |
| Δ <i>osaR</i> Δ <i>dsbM</i>     | PAK Δ <i>osaR</i> Δ <i>dsbM</i>                                                                                                                                                                                                                                           | This study                 |
| Δ <i>oxyR</i>                   | PAK Δ <i>oxyR</i>                                                                                                                                                                                                                                                         | This study                 |
| Δ <i>oxyR</i> Δ <i>osaR</i>     | PAK Δ <i>oxyR</i> Δ <i>osaR</i>                                                                                                                                                                                                                                           | This study                 |
| Δ <i>oxyR</i> Δ <i>dsbM</i>     | PAK Δ <i>oxyR</i> Δ <i>dsbM</i>                                                                                                                                                                                                                                           | This study                 |
| 55OE                            | PAK/pUCP19- <i>PA0055</i> , Cb <sup>r</sup> ; PAK containing the pUCP19- <i>PA0055</i> vector;                                                                                                                                                                            | This study                 |
| 56OE                            | Overexpression of <i>PA0055</i> in WT<br>PAK/pUCP19- <i>osaR</i> , Cb <sup>r</sup> ; PAK containing the pUCP19- <i>osaR</i> vector; Overexpression of <i>osaR</i> in WT                                                                                                   | This study                 |
| 58OE                            | PAK/pUCP19- <i>dsbM</i> , Cb <sup>r</sup> ; PAK containing the                                                                                                                                                                                                            | This study                 |

|                                                       |                                                                                                                                                                                     |            |
|-------------------------------------------------------|-------------------------------------------------------------------------------------------------------------------------------------------------------------------------------------|------------|
|                                                       | pUCP19- <i>dsbM</i> vector; Overexpression of <i>dsbM</i> in WT                                                                                                                     |            |
| $\Delta dsbM/58OE$                                    | $\Delta dsbM/dsbM$ ; $\Delta dsbM$ /pUCP19- <i>dsbM</i> , Cb <sup>r</sup> ; $\Delta dsbM$ containing the pUCP19- <i>dsbM</i> vector; Overexpression of <i>dsbM</i> in $\Delta dsbM$ | This study |
| $\Delta osaR/58OE$                                    | $\Delta osaR/dsbM$ ; $\Delta osaR$ /pUCP19- <i>dsbM</i> , Cb <sup>r</sup> ; $\Delta osaR$ containing the pUCP19- <i>dsbM</i> vector; Overexpression of <i>dsbM</i> in $\Delta osaR$ | This study |
| PAK/pUCP19                                            | Cb <sup>r</sup> ; PAK containing the pUCP19 vector                                                                                                                                  | This study |
| $\Delta osaR$ /pUCP19                                 | Cb <sup>r</sup> ; $\Delta osaR$ containing the pUCP19 vector                                                                                                                        | This study |
| $\Delta dsbM$ /pUCP19                                 | Cb <sup>r</sup> ; $\Delta dsbM$ containing the pUCP19 vector                                                                                                                        | This study |
| PAK/Tn7:: P <sub>PA0057</sub> - <i>gfp</i>            | PAK with P <sub>PA0057</sub> - <i>gfp</i> inserted on chromosome with mini-Tn7T insertion; Gm <sup>r</sup>                                                                          | This study |
| $\Delta osaR$ /Tn7:: P <sub>PA0057</sub> - <i>gfp</i> | $\Delta osaR$ with P <sub>PA0057</sub> - <i>gfp</i> inserted on chromosome with mini-Tn7T insertion; Gm <sup>r</sup>                                                                | This study |
| Plasmids                                              |                                                                                                                                                                                     |            |
| pET28a                                                | Kan <sup>r</sup> ; vectors carry an N-terminal His-Tag/thrombin/T7-Tag configuration plus an optional C-terminal His-Tag sequence                                                   | Novagen    |
| pETMALc-H                                             | Kan <sup>r</sup> ; maltose-binding protein (MBP) fusion expression vector                                                                                                           | (3)        |
| pDN18                                                 | Tc <sup>r</sup> ; Broad-host-range plasmid, IncP                                                                                                                                    | (4)        |
| pDN19lac $\Omega$                                     | Sp <sup>r</sup> Sm <sup>r</sup> Tc <sup>r</sup> ; Promoterless <i>lacZ</i> fusion vector                                                                                            | (4)        |
| pUCP19                                                | Ap <sup>r</sup> ; Broad-host-range shuttle vector                                                                                                                                   | (5)        |
| pMH305                                                | Gm <sup>r</sup> ; pUCP22NotI-based expression vector carrying a promoterless <i>gfpmut3b*</i> gene                                                                                  | (6)        |
| pUC18T-mini-Tn7T-Gm                                   | mini-Tn7 base vector from insertion into chromosome attTn7 site; Gm <sup>r</sup>                                                                                                    | (7)        |
| pET28a- <i>osaR</i>                                   | Kan <sup>r</sup> ; <i>osaR</i> cloned into pET28a at <i>Nco I/Xho I</i> site                                                                                                        | This study |
| pET28a-PA0055                                         | Kan <sup>r</sup> ; PA0055 cloned into pET28a at <i>Nde I/Eco RI</i> site                                                                                                            | This study |
| pETMAL- <i>osaR</i>                                   | Kan <sup>r</sup> ; pETMALc-H vector carrying the malE- <i>osaR</i> fusion at <i>Bam HI/Hind III</i> .                                                                               | This study |
| pDN18- <i>osaR</i>                                    | Tc <sup>r</sup> ; <i>osaR</i> gene cloned into pDN18 for complement of <i>osaR</i> at <i>Eco RI/Hind III</i> .                                                                      | This study |
| pDN18- <i>dsbM</i>                                    | Tc <sup>r</sup> ; <i>dsbM</i> gene cloned into pDN18 for complement of <i>dsbM</i> at <i>Eco RI/Hind III</i> .                                                                      | This study |
| pUCP19-PA0055                                         | Ap <sup>r</sup> ; PA0055 gene cloned into pUCP19 for overexpression of PA0055 at <i>Hind III/Eco RI</i> .                                                                           | This study |
| pUCP19- <i>osaR</i>                                   | Ap <sup>r</sup> ; <i>osaR</i> gene cloned into pUCP19 for overexpression of <i>osaR</i> at <i>Hind III/Eco RI</i> .                                                                 | This study |
| pUCP19- <i>osaR-his</i>                               | Ap <sup>r</sup> ; <i>osaR-his</i> tag fusion cloned into pUCP19                                                                                                                     | This study |

|                                        |                                                                                                                                                        |            |
|----------------------------------------|--------------------------------------------------------------------------------------------------------------------------------------------------------|------------|
|                                        | for overexpression of <i>osaR</i> at <i>Hind</i> III/ <i>Eco</i> RI.                                                                                   |            |
| pUCP19- <i>dsbM</i>                    | Ap <sup>r</sup> ; <i>dsbM</i> gene cloned into pUCP19 for overexpression of <i>dsbM</i> at <i>Hind</i> III/ <i>Eco</i> RI.                             | This study |
| P <sub><i>katA</i></sub> - <i>gfp</i>  | Gm <sup>r</sup> ; pMH305 vector carrying the P <sub><i>katA</i></sub> - <i>gfp</i> fusion at <i>Eco</i> RI/ <i>Kpn</i> I.                              | This study |
| P <sub><i>katB</i></sub> - <i>gfp</i>  | Gm <sup>r</sup> ; pMH305 vector carrying the P <sub><i>katB</i></sub> - <i>gfp</i> fusion at <i>Eco</i> RI/ <i>Kpn</i> I.                              | This study |
| P <sub><i>oxyR</i></sub> - <i>gfp</i>  | Gm <sup>r</sup> ; pMH305 vector carrying the P <sub><i>oxyR</i></sub> - <i>gfp</i> fusion at <i>Eco</i> RI/ <i>Kpn</i> I.                              | This study |
| P <sub><i>osaR</i></sub> - <i>lacZ</i> | Sp <sup>r</sup> Sm <sup>r</sup> Tc <sup>r</sup> ; P <sub><i>osaR</i></sub> - <i>lacZ</i> fusion reporter in pDN19lacΩ at <i>Eco</i> RI/ <i>Bam</i> HI. | This study |
| P <sub>PA0057</sub> - <i>lacZ</i>      | Sp <sup>r</sup> Sm <sup>r</sup> Tc <sup>r</sup> ; P <sub>PA0057</sub> - <i>lacZ</i> fusion reporter in pDN19lacΩ at <i>Eco</i> RI/ <i>Bam</i> HI.      | This study |
| pTn7-P <sub>PA0057</sub> - <i>gfp</i>  | Gm <sup>r</sup> ; pUC18T-mini-Tn7T-Gm vector carrying the P <sub>PA0057</sub> - <i>gfp</i> fusion at <i>Eco</i> RI/ <i>Sac</i> I.                      | This study |

<sup>a</sup> Faculty of Medicine, Memorial University of Newfoundland, Canada A1B 3V6

Table S2. PCR primers used in this study

| Gene (purpose)                       | size (bp) | Primer name | Primer sequence                          |
|--------------------------------------|-----------|-------------|------------------------------------------|
| <i>osaR</i> (knock sequencing)       | 1000      | P0056YF     | 5'- ACCAGCAGTTCGAGGACACG-3'              |
|                                      |           | P0056YR     | 5'-ACTCCAGCGCAGCACCATCA -3'              |
| <i>dsbM</i> (knock sequencing)       | 1000      | P0058YF     | 5'-CCGACCCACTCCTCCAACCTC-3'              |
|                                      |           | P0058YR     | 5'-TCCAGATAACTGCCGTCCTCC-3'              |
| PA0055(overexpression)               | 580       | PA0055OEF   | 5'-CCCAAGCTTGATGTCCCTGTCGATCTACCA-3'     |
|                                      |           | PA0055OER   | 5'-CCGGAATTCGGGTTTTCCGATCCATTC-3'        |
| <i>osaR</i> (overexpression)         | 996       | PA0056OEF   | 5'-CCCAAGCTTGATGGACCGCCTGACCG-3'         |
|                                      |           | PA0056OER   | 5'-CCGGAATTCAGACAGGGGATAAAGGTG-3'        |
| <i>dsbM</i> (overexpression)         | 858       | PA0058OEF   | 5'-CCCAAGCTTGATGAACGACCTCACCTG-3'        |
|                                      |           | PA0058OER   | 5'-CCGGAATTCGCGGATGCCGTCTTCT-3'          |
| <i>osaR</i> (complement)             | 989       | PA0056CF    | 5'-CCGGAATTCATGGACCGCCTGACCGCC-3'        |
|                                      |           | PA0056CR    | 5'-CCCAAGCTTGGGATAAAGGTGCGTCG-3'         |
| <i>dsbM</i> (complement)             | 858       | PA0058CF    | 5'-CCGGAATTCATGAACGACCTCACCTGC-3'        |
|                                      |           | PA0058CR    | 5'-CCCAAGCTTCGCGGATGCCGTCTTCTC-3'        |
| <i>osaR</i> (expression)             | 938       | PA56EF      | 5'-                                      |
|                                      |           | PA56ER      | CATGCCATGGGCATGGACCGCCTGACCGCCACTCGCG-3' |
|                                      |           |             | 5'-CCGCTCGAGCGCCAGCGCCAGGGGGCCCCG-3'     |
| <i>malE-osaR</i> (fusion expression) | 949       | 3RH-PA56F   | 5'-CGCGGATCCATGGACCGCCTGACCGC-3'         |
|                                      |           | 3RH-PA56R   | 5'-CCCAAGCTTTCAGCAGTCTACCCGGCTT-3'       |

|                                                  |     |            |                                    |
|--------------------------------------------------|-----|------------|------------------------------------|
| <i>malE-osaR</i> (fusion expression sequencing ) |     | CX-RHPA56F | 5'-GGTCGTCAGACTGTTCGATGAAGCC-3'    |
| PA0055(qPCR)                                     | 181 | PA0055RTF  | 5'-GAGCTACGCGGATACGGAAAC-3'        |
|                                                  |     | PA0055RTR  | 5'-GGCGAAGCCGAAGAGGAA-3'           |
| PA0057(qPCR)                                     | 176 | PA0057RTF  | 5'-GGGCCGATCCTCAAGGACAAC-3'        |
|                                                  |     | PA0057RTR  | 5'-ACCAGCACGCCACCAACCAC-3'         |
| <i>dsbM</i> (qPCR)                               | 113 | PA0058RTF  | 5'- GCCTGCGAGGTGACGGGTCTGG -3'     |
|                                                  |     | PA0058RTR  | 5'- AGGTCATGGGGCATCACGTAGTGGC -3'  |
| <i>rpsL</i> (qPCR)                               | 150 | rspLRTF    | 5'-ACGTGCCTGCGCTGCAAAC-3'          |
|                                                  |     | rspLRTR    | 5'-CCCAGGTGTCCAGCGAACC-3'          |
| <i>osaR</i> F1(EMSA)                             | 297 | PA56J1F    | 5'-CGAGACCATCGCCCGGACA-3'          |
|                                                  |     | PA56J1R    | 5'-GTTCGGCGCTGGCGGCGAAG-3'         |
| <i>osaR</i> F2IR(EMSA)                           | 238 | PA56F2JF   | 5'-CCTCCAACCTCGGCGAGGTAGCG-3'      |
|                                                  |     | PA56F2JR   | 5'-GCGACATGAGCGGTTCTCCAGG-3'       |
| <i>osaR</i> IR(EMSA)                             | 108 | 5657JGF    | 5'-TTCGCTCGATCCATGCAACAAAG-3'      |
|                                                  |     | 5657JGR    | 5'-CATGAGCGGTTCTCCAGGCAGT-3'       |
| <i>osaR</i> F2IRC(EMSA)                          | 90  | F2JGMF     | 5'-CGATGACTTCGACGAAGACG-3'         |
|                                                  |     | F2JGMR     | 5'- AAAAGCCCCGCAATAATCAC-3'        |
| <i>osaR</i> F3(EMSA)                             | 110 | PA56J4F    | 5'-GCGCCATGGATTGCTTCGTT-3'         |
|                                                  |     | PA56J4R    | 5'-CGGGGTTGTAGACCTCCAGCC-3'        |
| EMSAc                                            | 185 | EMSAcF     | 5'-GCTGTCCCATGAACTACGCC-3'         |
|                                                  |     | EMSAcR     | 5'-GCCAGGATGTCCCAACTGAA-3'         |
| <i>flpJG</i> (EMSA)                              | 459 | flpF       | 5'-GCCGAGGTATCCGAGCAACA -3'        |
|                                                  |     | flpR       | 5'- GCAATCACCGAGACAGAGCC-3'        |
| $P_{PA0057}$ (promoter-lacZ)                     | 421 | P0057F     | 5'-CCGGAATTCCTAGCCCACCAGCAGTTCC-3' |
|                                                  |     | P0057R     | 5'-CGCGGATCCTTAGCCCACCAGCAGTTCC-3' |
| $P_{osaR}$ (promoter-lacZ)                       | 420 | P0056F     | 5'-CCGGAATTCGCCACCAGCAGTTCC-3'     |
|                                                  |     | P0056R     | 5'-CGCGGATCCTTAGACCCACTCCTCCAAC-3" |
| <i>oxyR</i> (qPCR)                               | 192 | oxyR-F     | 5'-TCTTCGAGCGCAGCAAGAGCG-3'        |
|                                                  |     | oxyR-R     | 5'-GAATCAGGTGCGGGAACAGGTAGG-3'     |
| <i>katA</i> (qPCR)                               | 124 | katA-F     | 5'-GGCTTCTTCGAGCTGAACCGTAAC-3'     |
|                                                  |     | katA-R     | 5'-GACGGCCCTGGAGCATCTTGTC-3'       |
| <i>katB</i> (qPCR)                               | 103 | katB-RTF   | 5'-CCGGTATTCGTGCGCTTCTCCG-3'       |
|                                                  |     | katB-RTR   | 5'-TGCCGTCTGCGGTATAGAACTTGGTG-3'   |
| <i>ahpB</i> (qPCR)                               | 188 | ahpB-F     | 5'-GCCTTGCGTGCTTCGTTCTCG-3'        |
|                                                  |     | ahpB-R     | 5'-GCGCTCGCCTTCATGCCTTTCTG-3'      |
| <i>ahpC</i> (qPCR)                               | 96  | ahpC-RTF   | 5'-GCAAGTGGTCGGTCTCTGATCTTCA-3'    |
|                                                  |     | ahpC-RTR   | 5'-TCTGGAACCTCGCCGTAGTTGTTGG-3'    |
| <i>ahpF</i> (qPCR)                               | 115 | ahpF-RTF   | 5'-GGCATCGAGGGCACCTTCGAGTTC-3'     |
|                                                  |     | ahpF-RTR   | 5'-CGTGACGGATGTTGCGGTTGAGC-3'      |
| <i>katAJG1</i> (EMSA)                            | 208 | katAJG1F   | 5'-AAGCTACGTTCCGATAAGCGAG -3'      |
|                                                  |     | katAJG1R   | 5'- TGCACGTTCTGTTATCGACC-3'        |

|                                |               |                   |                                                               |
|--------------------------------|---------------|-------------------|---------------------------------------------------------------|
| <i>katA</i> JG2(EMSA)          | 231           | <i>katA</i> JG2F  | 5'-GTCGGCGGTGAAGTCGTAGAAGC -3'                                |
|                                |               | <i>katA</i> JG2R  | 5'-ACAACCTGTCGGCTGAACCAAGC-3'                                 |
| <i>katB</i> JG1(EMSA)          | 235           | <i>katB</i> JG1F  | 5'- ACTTCGCAGGCAAATAAGAAGGT-3'                                |
|                                |               | <i>katB</i> JG1R  | 5'- TGGAAGAGCTCCTAATGGCTTGT -3'                               |
| <i>katB</i> JG2(EMSA)          | 334           | <i>katB</i> JG2F  | 5'- AATTCACTCAGAAGACCCATGG -3'                                |
|                                |               | <i>katB</i> JG2R  | 5'- TTATTTGCCTGCGAAGTTAGG -3'                                 |
| <i>oxyR</i> JG(EMSA)           | 137           | <i>oxyR</i> JGF   | 5'-GAAGCCGTCTCCTTCCTACAAC-3'                                  |
|                                |               | <i>oxyR</i> JGR   | 5'-GGCTGCTCATCCGTTAAGATCG-3'                                  |
| <i>ahpB</i> JG(EMSA)           | 237           | <i>ahpB</i> JGF   | 5'-GGAATAGCCAGAGCAGGCGTGT-3'                                  |
|                                |               | <i>ahpB</i> JGR   | 5'-TGTTGACCAGTACGCTCATCGC -3'                                 |
| <i>ahpF</i> JG(EMSA)           | 175           | <i>ahpF</i> JGF   | 5'- ACCTGGTCGGCAAGATCTAAGACCG-3'                              |
|                                |               | <i>ahpF</i> JGR   | 5'-GCGTCCAACATGGTTCAGCTCCTC-3'                                |
| <i>ahpC</i> JG1(EMSA)          | 203           | <i>ahpC</i> JG1F  | 5'-GCACTGACGAGGGCAGGTTCTT-3'                                  |
|                                |               | <i>ahpC</i> JG1R  | 5'-AACGTTGGACTTGAGTGTGATC-3'                                  |
| <i>ahpC</i> JG2(EMSA)          | 217           | <i>ahpC</i> JG2F  | 5'-GCTGCTCGGTGCCTGGTTGT-3'                                    |
|                                |               | <i>ahpC</i> JG2R  | 5'- AACCTGCCCTCGTCAGTGCC -3'                                  |
| <i>katA</i> (promoter-gfp)     | 398           | <i>katA</i> PF    | 5'-CCGGAATTCGTCGGCGGTGAAGTCGTAGAA-3'                          |
|                                |               | <i>katA</i> P2R   | 5'-CGGGGTACC<br>TTACTGCACGTTCTGGTTATCGACC-3'                  |
| <i>katB</i> (promoter-gfp)     | 564           | <i>katB</i> PF    | 5'- CCGGAATTC AATTC ACTCAGAAGACCCATG-3'                       |
|                                |               | <i>katB</i> P2R   | 5'-CGGGGTACC GGAAGAGCTCCTAATGGCT-3'                           |
| <i>oxyR</i> (promoter-gfp)     | 155           | <i>oxyR</i> PF    | 5'-CCGGAATTC GAAGCCGTCTCCTTCCTACAAC-3'                        |
|                                |               | <i>oxyR</i> P2R   | 5'-CGGGGTACC GGCTGCTCATCCGTTAAGATCG-3'                        |
| <i>oxyR</i> (knock out)        | 424           | <i>oxyR</i> -upF  | 5'-GGGGACAAGTTTGTACAAAAAAGCAGGCTC<br>ATGCAACCAGCCCAGCACATG-3' |
|                                |               | <i>oxyR</i> -upR  | 5'-TCACATGGCTGCTCATCCGTTAAGATC-3'                             |
| <i>oxyR</i> (knock out)        | 474           | <i>oxyR</i> -doF  | 5'-TGACCGAGCTGTCCAGGGTCCC-3'                                  |
|                                |               | <i>oxyR</i> -doR  | 5'-GGGGACCACTTTGTACAAGAAAGCTGG<br>GTAGCTGCTGGGTGAGTCCTTCG-3'  |
| <i>oxyR</i> (knock sequencing) | 1990/13<br>30 | <i>oxyR</i> seq-F | 5'-TAGACCCCGGTGCTGGAGACG-3'                                   |
|                                |               | <i>oxyR</i> seq-R | 5'-CGAGCGGGCCAAGTTGTAAT-3'                                    |

Table S3. MIC of *P. aeruginosa* PAK,  $\Delta$ *osaR*,  $\Delta$ *dsbM* and  $\Delta$ *osaR* $\Delta$ *dsbM* against non-aminoglycosides antibiotics investigated.

| Bacterial strain                          | Relevant genotype                         | MIC of compound ( $\mu$ g ml <sup>-1</sup> ) |              |               |
|-------------------------------------------|-------------------------------------------|----------------------------------------------|--------------|---------------|
|                                           |                                           | Chloramphenicol                              | Tetracycline | Ciprofloxacin |
| PAK                                       | WT                                        | 50                                           | 16           | 0.5           |
| $\Delta$ <i>osaR</i>                      | $\Delta$ <i>osaR</i>                      | 50                                           | 16           | 0.5           |
| $\Delta$ <i>dsbM</i>                      | $\Delta$ <i>dsbM</i>                      | 50                                           | 16           | 0.5           |
| $\Delta$ <i>osaR</i> $\Delta$ <i>dsbM</i> | $\Delta$ <i>osaR</i> $\Delta$ <i>dsbM</i> | 50                                           | 16           | 0.5           |

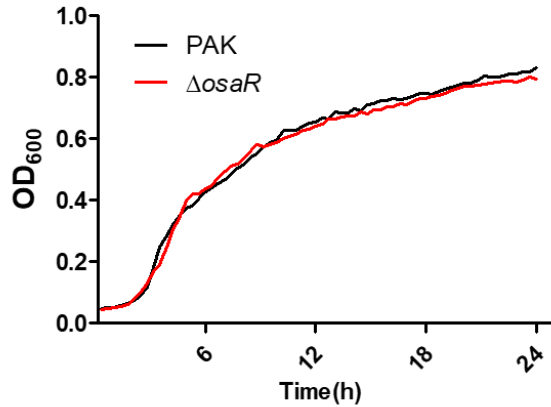

**Fig. S1. The knocking out of *osaR* have no effect on growth rate.** Overnight culture were diluted into fresh LB medium with 1/100, 100 $\mu$ l of culture was transferred into each of the well of a 96-wells microplate, OD<sub>600</sub> was measured every 30 minutes for 24 hours at 37°C 200 rpm in microplate reader.

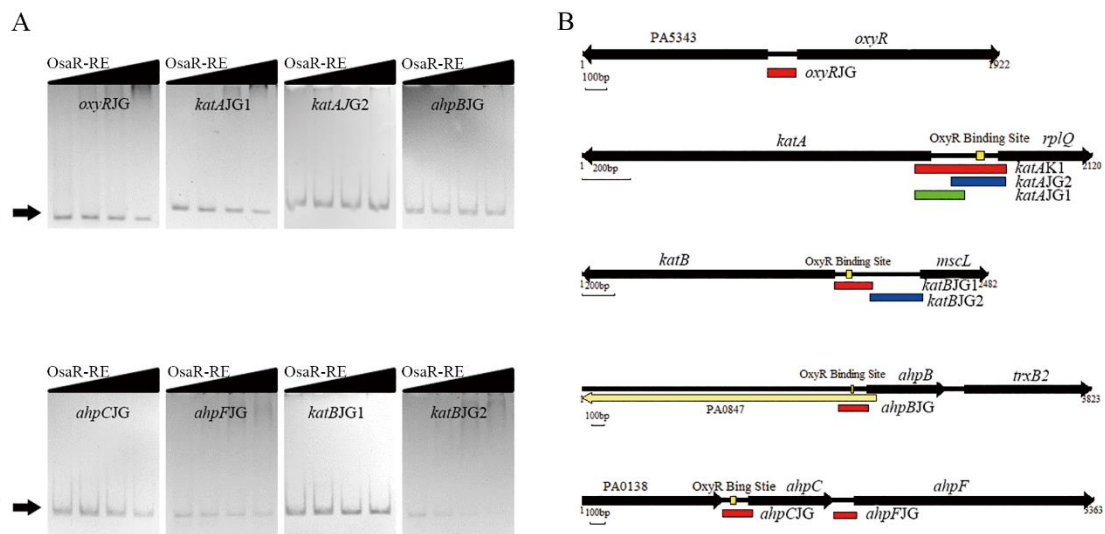

**Fig. S2. The regulation of *oxyR* and the genes belonging to the OxyR regulon by OsaR is indirect.** (A) EMSA assays of OsaR-RE binding with promoter region of *oxyR*, *katA*, *katB*, *ahpB* and *ahpCF*; DNA fragments information are shown in (B). OsaR was used in the following concentration (nM): 0, 50, 100, 200. Black arrows indicate free DNA.

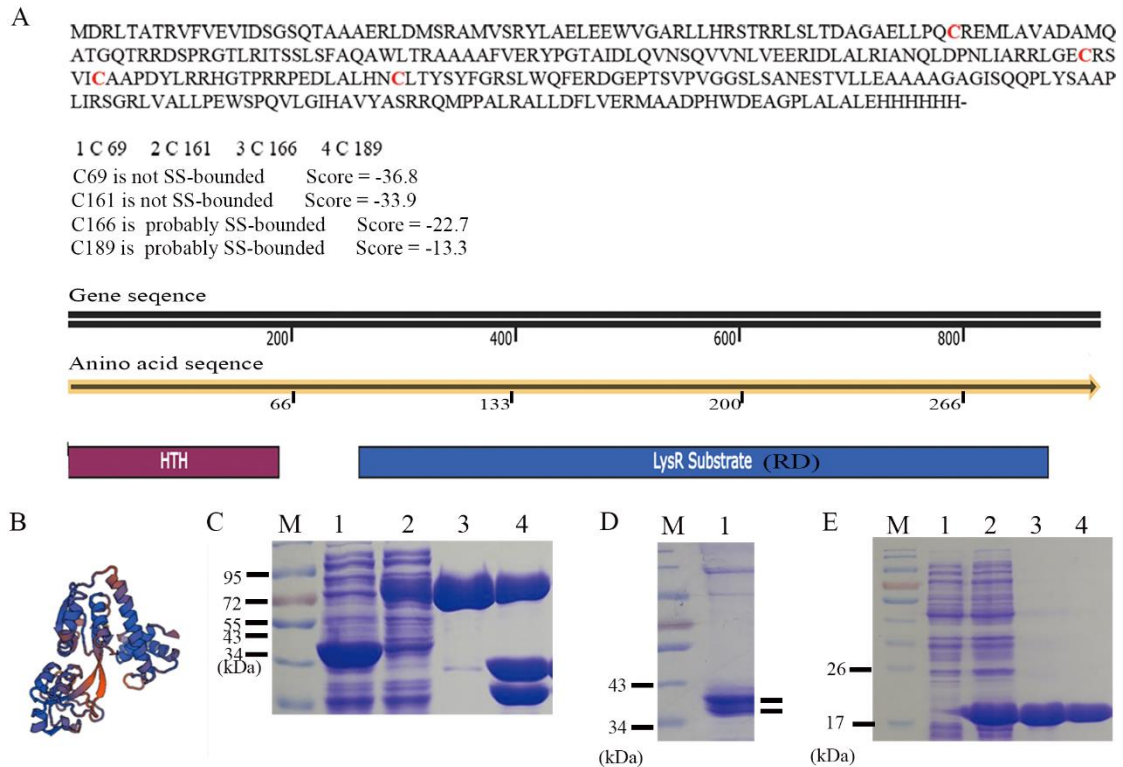

**Fig. S3. Expression and purification of OsaR protein (C-D) and PA0055 protein(E).** (A) the amino sequence of OsaR, which have four cysteines in red color. C166 and C189 are located at regulate domain(RD) and form disulfide bond probably. (B) OsaR tertiary structure prediction. OsaR was expressed in BL21(DE3) host strain via pET28a insolubility (C) MBP- OsaR fusion expression (Lane 2), purification (Lane 3), cleavage(Lane 4) and Lane 1 is MBP expression control as followed by SDS-PAGE. (D) nonreducing SDS-PAGE of OsaR protein (purified with inclusion body; M:Protein marker. (E)PA0055 protein expression in the BL21(DE3) strain with pET28a vector. Lane 1, negative control; Lane 2 cell lysate supernatant; Lane 3, acquired pure PA0055 protein in 200 mM imidazole solution; Lane 4, pure PA0055 after ultra-filtration desalination). The same molecular weight marker was used for all SDS-PAGE analyses.

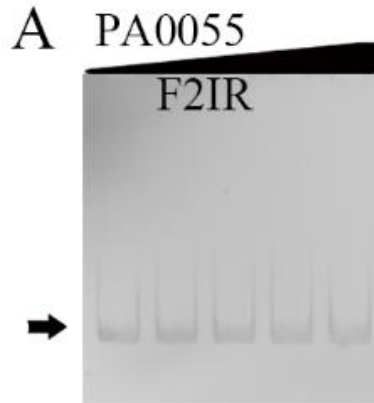

**Fig. S4. The EMSA of PA0055 protein with F2IR.** PA0055 used in the following concentration (nM) 0, 50, 100, 200, 400. All the data were obtained from at least three independent experiments.

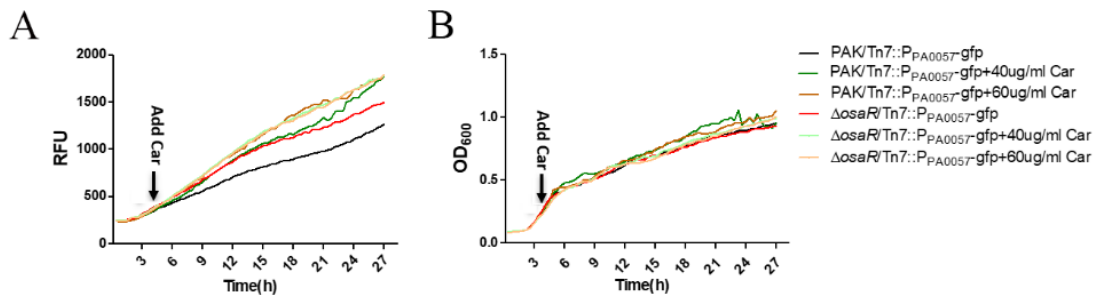

**Fig. S5. Promoter  $P_{PA0057}$  can be induced by carbenicillin.** Bacteria were treated with given concentration of carbenicillin at the  $OD_{600}$  of 0.4 in LB at 37°C. (B)  $OD_{600}$  and (A) GFP fluorescence readings (relative fluorescence units/RFU) were measured every 30 minutes for 24 hours. All the data were obtained from at least three independent experiments with at least three replicates.

## REFERENCE

1. Han Xiao LY, Ma Yibing, Xu Haijin, Qiao Mingqiang 2019. Interaction between Disulfide Oxidoreductase (DsbM) and LysR Type Transcriptional Regulator (PA0056) in *Pseudomonas aeruginosa* Acta Scientiarum Naturalium Universitatis Nankaiensis 52:6.
2. Wang X, Li M, Liu L, Mou R, Zhang X, Bai Y, Xu H, Qiao M. 2012. DsbM, a novel disulfide oxidoreductase affects aminoglycoside resistance in *Pseudomonas aeruginosa* by OxyR-regulated response. J Microbiol 50:932-8.
3. Pryor KD, Leiting B. 1997. High-Level Expression of Soluble Protein in *Escherichia coli* Using a His6-Tag and Maltose-Binding-Protein Double-Affinity Fusion System. Protein Expression and Purification 10:309-319.



4. Totten PA, Lory S. 1990. Characterization of the type a flagellin gene from *Pseudomonas aeruginosa* PAK. *Journal of Bacteriology* 172:7188-7199.
5. Schweizer HP. 1991. Escherichia-Pseudomonas shuttle vectors derived from pUC18/19. *Gene* 97:109-112.
6. Rybtke MT, Borlee BR, Murakami K, Irie Y, Hentzer M, Nielsen TE, Givskov M, Parsek MR, Tolker-Nielsen T. 2012. Fluorescence-Based Reporter for Gauging Cyclic Di-GMP Levels in *Pseudomonas aeruginosa*. *Applied and Environmental Microbiology* 78:5060-5069.
7. Choi KH, Schweizer HP. 2006. Mini-Tn7 insertion in bacteria with single attTn7 sites: example *Pseudomonas aeruginosa*. *Nature Protocols* 1:153-161.
